# Supplementary material
Source: MDPI journal article supplement (https://www.mdpi.com/1999-4907/15/5/806)
Supplement: s1 [file s1]

---

## *Supplementary Material*

Root respiration-trait relationships are influenced by leaf habit in tropical plants

Danting Deng, Yanfei Sun \*, Meiqiu Yang

\* Corresponding author: Yanfei Sun

Tel: +86 0898-66263571

E-mail: [sunyanfei@hainanu.edu.cn](mailto:sunyanfei@hainanu.edu.cn)

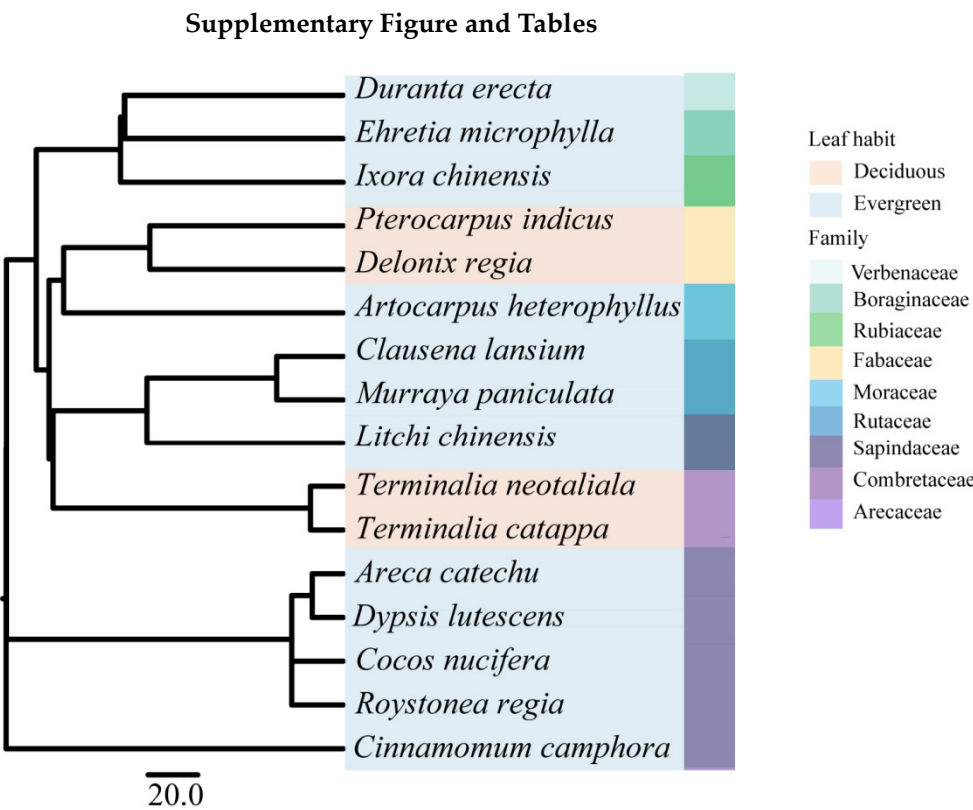

Figure S1. Phylogeny trees mapped onto each of the 16 species in this study.

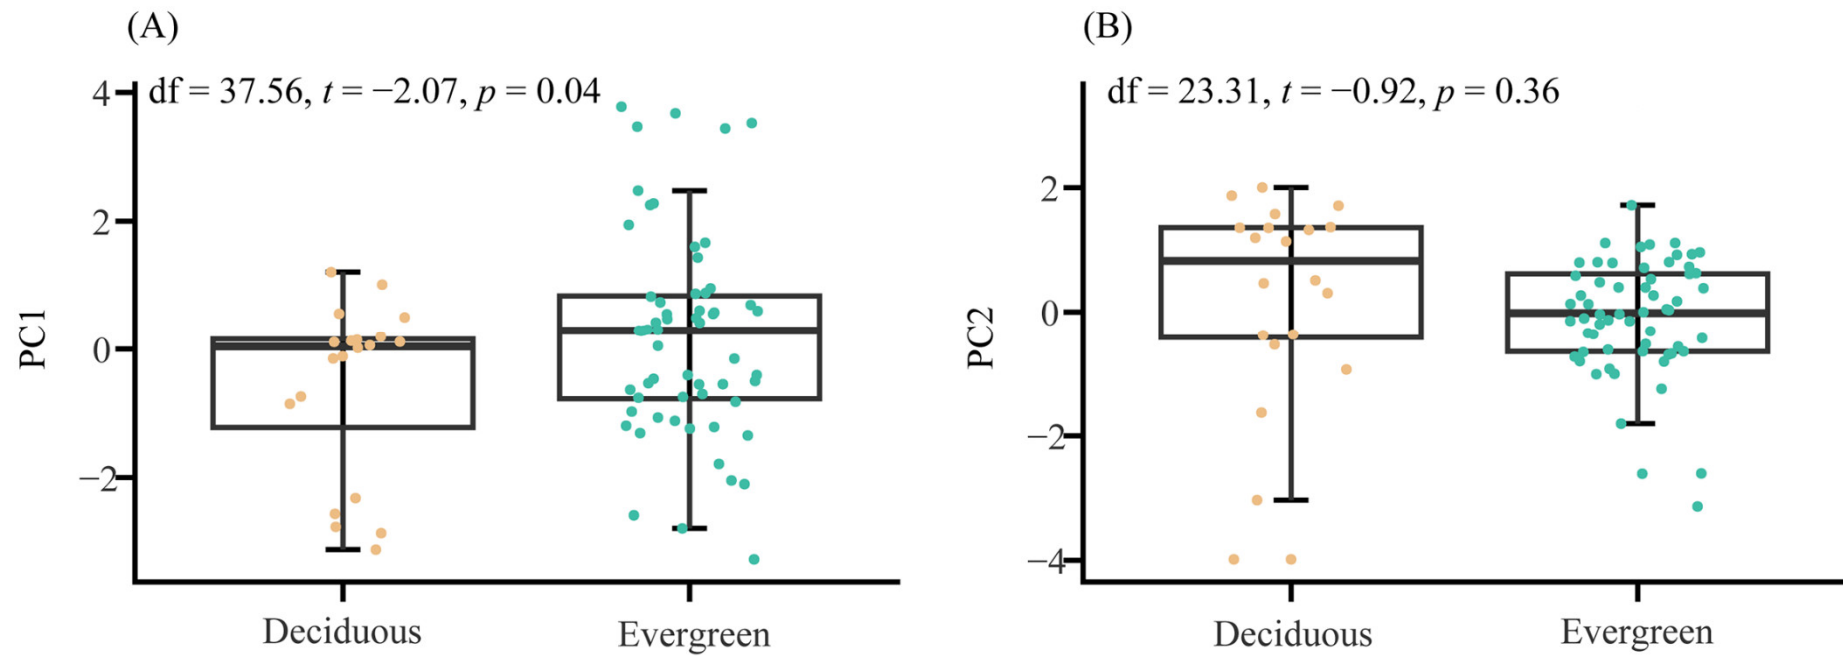

**Figure S2.** Results of independent-samples t-test for elucidating the differences between deciduous and evergreen species along PC1 and PC2. Box-plots illustrate the inter-quartile range (25%–75%).

**Table S1.** The test of the phylogenetic signal of the root traits, including Blomberg's K and Pagel's  $\lambda$ .

| Root traits                                                | Blomberg's K test |      | Pagel's $\lambda$ |      |
|------------------------------------------------------------|-------------------|------|-------------------|------|
|                                                            | K                 | p    | $\lambda$         | p    |
| SRL (m g <sup>-1</sup> )                                   | 0.35              | 0.56 | 0.02              | 0.94 |
| RD (mm)                                                    | 0.57              | 0.12 | 0.44              | 0.17 |
| RTD (g cm <sup>-3</sup> )                                  | 0.28              | 0.77 | 0.00              | 1    |
| RCC (mg g <sup>-1</sup> )                                  | 0.62              | 0.08 | 0.61              | 0.38 |
| RNC (mg g <sup>-1</sup> )                                  | 0.52              | 0.23 | 0.3               | 0.43 |
| C/N                                                        | 0.55              | 0.16 | 0.35              | 0.35 |
| RR (nmol CO <sub>2</sub> g <sup>-1</sup> s <sup>-1</sup> ) | 0.33              | 0.58 | 0.00              | 1    |

SRL, specific root length; RD, root diameter; RTD, root tissue density; RCC, root carbon concentration; RNC, root nitrogen concentration; C/N, root carbon-to-nitrogen ratio; RR, root respiration rate.

**Table S2.** Results of the PCA on root morphological traits (*e.g.*, SRL, RD, and RTD), chemical traits, and respiration rate for the 16 study species and deciduous with evergreen.

| Traits                                                     | All species |       | Deciduous |       | Evergreen |       |
|------------------------------------------------------------|-------------|-------|-----------|-------|-----------|-------|
|                                                            | PC1         | PC2   | PC1       | PC2   | PC1       | PC2   |
| RR (nmol CO <sub>2</sub> g <sup>-1</sup> s <sup>-1</sup> ) | -0.46       | -0.36 | -0.20     | -0.57 | -0.44     | -0.36 |
| RNC (mg g <sup>-1</sup> )                                  | -0.27       | -0.22 | -0.52     | -0.05 | -0.41     | 0.41  |
| RD (mm)                                                    | 0.50        | -0.44 | -0.50     | 0.31  | 0.47      | -0.21 |
| RTD (g cm <sup>-3</sup> )                                  | 0.26        | 0.57  | 0.30      | 0.47  | 0.27      | 0.54  |
| RCC (mg g <sup>-1</sup> )                                  | 0.19        | -0.53 | -0.46     | -0.18 | 0.19      | -0.59 |
| SRL (m g <sup>-1</sup> )                                   | -0.59       | 0.09  | 0.37      | -0.56 | -0.55     | 0.13  |
| Proportion Var (%)                                         | 40.8        | 22.3  | 50.5      | 29.2  | 48.2      | 20.2  |
| Cumulative Var (%)                                         | 40.8        | 63.1  | 50.5      | 79.7  | 48.2      | 68.4  |

The table depicts loading scores on each axis and shows the proportion of variation explained. RR, root respiration rate; RNC, root nitrogen concentration; RD, root diameter; RTD, root tissue density; RCC, root carbon concentration; SRL, specific root length. PC represented the axis of the PCA.

**Table S3.** The relationships between root respiration and the co-variation in root traits (PC1 and PC2).

| Traits | ALL       |         | Deciduous |         | Evergreen |         |
|--------|-----------|---------|-----------|---------|-----------|---------|
|        | PC1       | PC2     | PC1       | PC2     | PC1       | PC2     |
| RR     | -0.48 *** | 0.34 ** | -0.21     | -0.54 * | -0.58 *** | -0.27 * |

RR, root respiration rate; PC represented the axis of the PCA. \*  $p < 0.05$ ; \*\*  $p < 0.01$ ; \*\*\*  $p < 0.001$ .
